# Supplementary material
Source: PubMed Central journal article supplement (PMC1891674)
Supplement: 97320630001127S1.pdf [file 97320630001127S1.pdf]

$$\hat{H}t_j = \frac{1}{\hat{H}t_{\text{sum}}} \exp\left(\frac{-(x_j - \bar{x})^2}{2\sigma_x^2}\right) \exp\left(\frac{-(y_j - \bar{y})^2}{2\sigma_y^2}\right) \exp\left(\frac{-(z_j - \bar{z})^2}{2\sigma_z^2}\right) \quad (\text{Equation 1})$$

where:  $\hat{H}t_j$  denotes the hydrophobicity for  $j$ -th grid point  $(x_j, y_j, z_j)$ , the  $(\bar{x}, \bar{y}, \bar{z})$  - the origin of coordinate system  $(0,0,0)$  and  $\sigma_x, \sigma_y, \sigma_z$  - the ellipsoid size ( $\frac{1}{3}$  of the maximum length along each axis, respectively). The coefficient  $\hat{H}t_{\text{sum}}$  (sum of hydrophobicity values attributed to all grid points) makes the  $\hat{H}t_j$  standardized (the sum of  $\hat{H}t_j$  over all grid points equal to 1.0).
