# Supplementary material
Source: PubMed Central journal article supplement (PMC1891674)
Supplement: 97320630001127S2.pdf [file 97320630001127S2.pdf]

$$\hat{H}o_j = \frac{1}{\hat{H}o_{sum}} \sum_{i=1}^N H_i^r \begin{cases} \left[ 1 - \frac{1}{2} \left( 7 \left( \frac{r_{ij}}{c} \right)^2 - 9 \left( \frac{r_{ij}}{c} \right)^4 + 5 \left( \frac{r_{ij}}{c} \right)^6 - \left( \frac{r_{ij}}{c} \right)^8 \right) \right] & \text{for } r_{ij} \leq c \text{ (Equation 2)} \\ \text{otherwise } 0 \end{cases}$$

where  $\hat{H}o_j$  - the empirical hydrophobicity attributed to  $j$ -th grid point being the result of hydrophobic interaction of side chains of individual  $\hat{H}_i^r$  hydrophobicity.  $\hat{H}o_{sum}$  - sum of all grid points hydrophobicity, which makes the distribution of empirical hydrophobicity standardized. The  $r_{ij}$  is the distance between  $i$ -th effective atoms and  $j$ -th grid point characterized by zero hydrophobicity. Each grid point collects the observed hydrophobicity  $\hat{H}o_j$  from effective atoms localized closer than  $9\text{\AA}$  (cut-off distance for hydrophobic interaction according to Levitt [11]). More details concerning the presented model can be found in recently published papers. [8, 9, 10]
